**Pearson correlation coefficient**

**A**

|                        | <b>C<sub>I</sub> 2</b> | <b>C<sub>I</sub> 1</b> | <b>C<sub>S</sub> 2</b> | <b>C<sub>S</sub> 1</b> | <b>F<sub>I</sub> 2</b> | <b>F<sub>I</sub> 1</b> | <b>F<sub>S</sub> 2</b> | <b>F<sub>S</sub> 1</b> |
|------------------------|------------------------|------------------------|------------------------|------------------------|------------------------|------------------------|------------------------|------------------------|
| <b>C<sub>I</sub> 2</b> | 1.00                   | 0.72                   | 0.28                   | 0.27                   | 0.68                   | 0.49                   | 0.16                   | 0.21                   |
| <b>C<sub>I</sub> 1</b> | 0.72                   | 1.00                   | 0.53                   | 0.62                   | 0.53                   | 0.56                   | 0.28                   | 0.38                   |
| <b>C<sub>S</sub> 2</b> | 0.28                   | 0.53                   | 1.00                   | 0.78                   | 0.58                   | 0.44                   | 0.58                   | 0.61                   |
| <b>C<sub>S</sub> 1</b> | 0.27                   | 0.62                   | 0.78                   | 1.00                   | 0.41                   | 0.45                   | 0.50                   | 0.60                   |
| <b>F<sub>I</sub> 2</b> | 0.68                   | 0.53                   | 0.58                   | 0.41                   | 1.00                   | 0.73                   | 0.65                   | 0.57                   |
| <b>F<sub>I</sub> 1</b> | 0.49                   | 0.56                   | 0.44                   | 0.45                   | 0.73                   | 1.00                   | 0.40                   | 0.50                   |
| <b>F<sub>S</sub> 2</b> | 0.16                   | 0.28                   | 0.58                   | 0.50                   | 0.65                   | 0.40                   | 1.00                   | 0.81                   |
| <b>F<sub>S</sub> 1</b> | 0.21                   | 0.38                   | 0.61                   | 0.60                   | 0.57                   | 0.50                   | 0.81                   | 1.00                   |

**Spearman's rank**

**B**

|                        | <b>C<sub>I</sub> 2</b> | <b>C<sub>I</sub> 1</b> | <b>C<sub>S</sub> 2</b> | <b>C<sub>S</sub> 1</b> | <b>F<sub>I</sub> 2</b> | <b>F<sub>I</sub> 1</b> | <b>F<sub>S</sub> 2</b> | <b>F<sub>S</sub> 1</b> |
|------------------------|------------------------|------------------------|------------------------|------------------------|------------------------|------------------------|------------------------|------------------------|
| <b>C<sub>I</sub> 2</b> | 1.00                   | 0.86                   | 0.62                   | 0.58                   | 0.51                   | 0.46                   | 0.49                   | 0.54                   |
| <b>C<sub>I</sub> 1</b> | 0.86                   | 1.00                   | 0.57                   | 0.61                   | 0.47                   | 0.48                   | 0.44                   | 0.55                   |
| <b>C<sub>S</sub> 2</b> | 0.62                   | 0.57                   | 1.00                   | 0.88                   | 0.36                   | 0.32                   | 0.72                   | 0.74                   |
| <b>C<sub>S</sub> 1</b> | 0.58                   | 0.61                   | 0.88                   | 1.00                   | 0.29                   | 0.33                   | 0.67                   | 0.75                   |
| <b>F<sub>I</sub> 2</b> | 0.51                   | 0.47                   | 0.36                   | 0.29                   | 1.00                   | 0.84                   | 0.47                   | 0.42                   |
| <b>F<sub>I</sub> 1</b> | 0.46                   | 0.48                   | 0.32                   | 0.33                   | 0.84                   | 1.00                   | 0.43                   | 0.49                   |
| <b>F<sub>S</sub> 2</b> | 0.49                   | 0.44                   | 0.72                   | 0.67                   | 0.47                   | 0.43                   | 1.00                   | 0.83                   |
| <b>F<sub>S</sub> 1</b> | 0.54                   | 0.55                   | 0.74                   | 0.75                   | 0.42                   | 0.49                   | 0.83                   | 1.00                   |

S4 Figure
