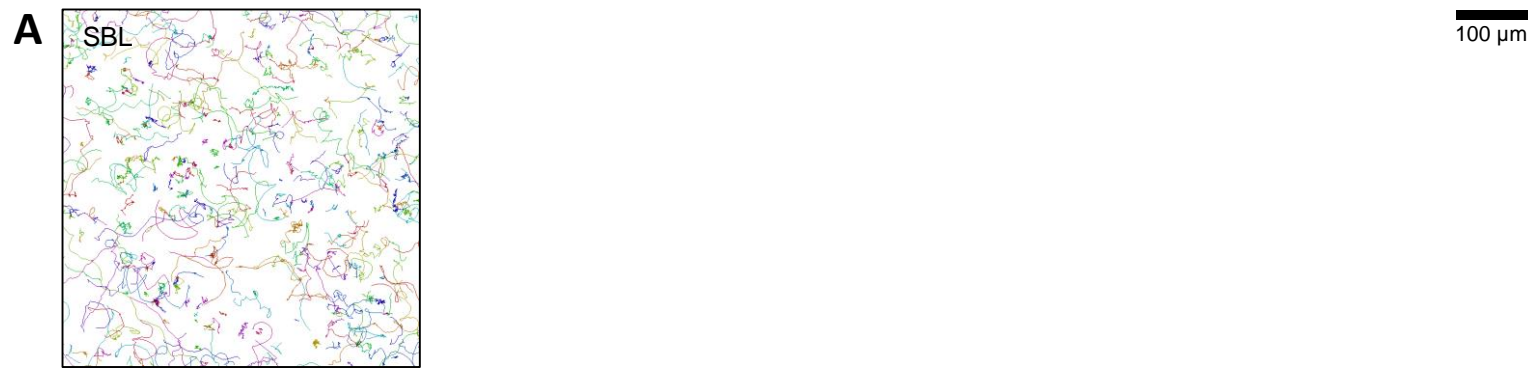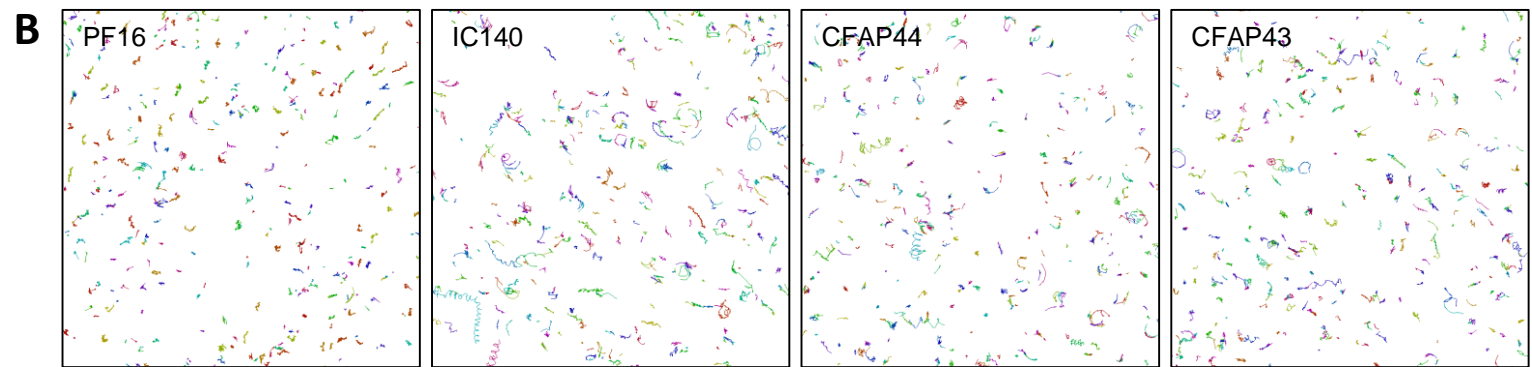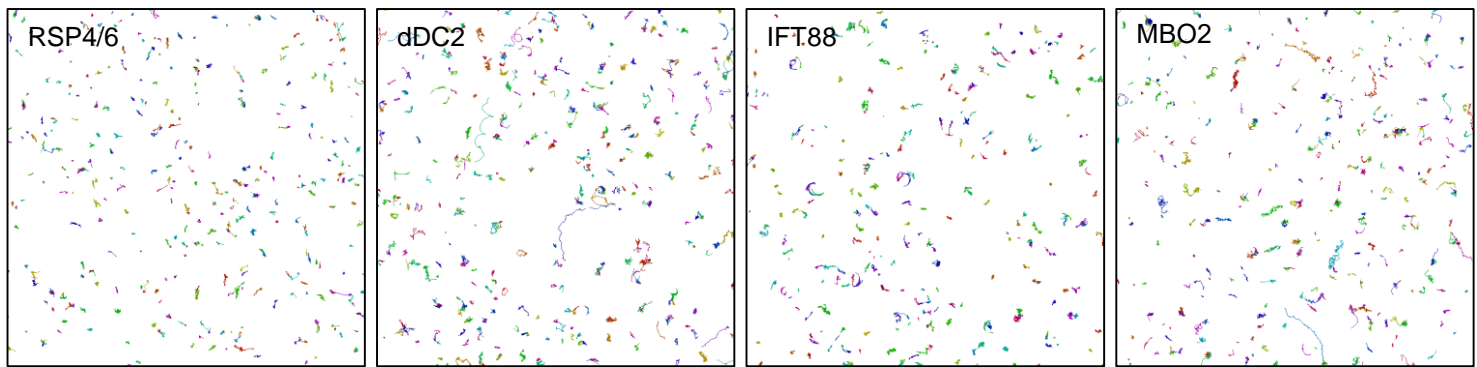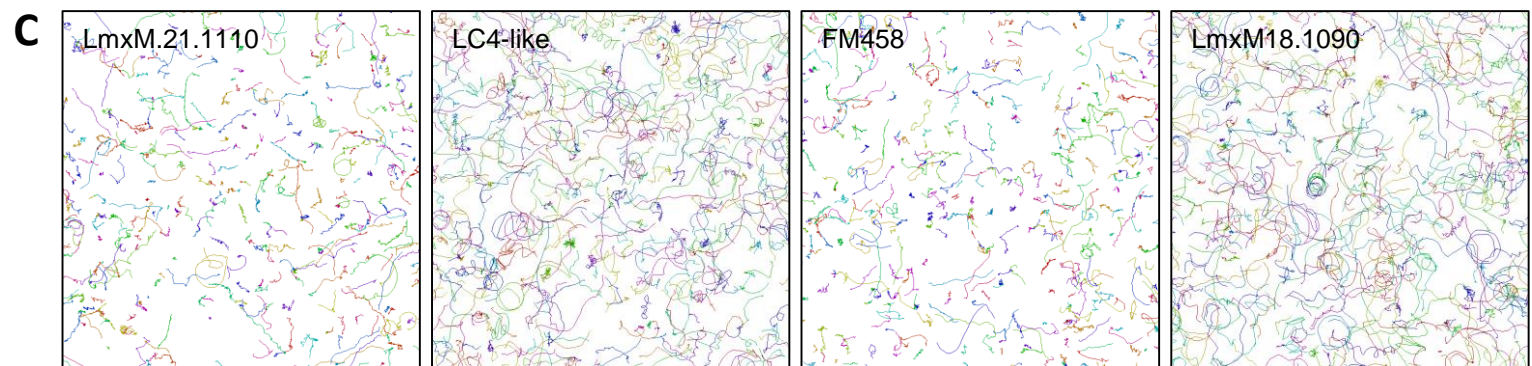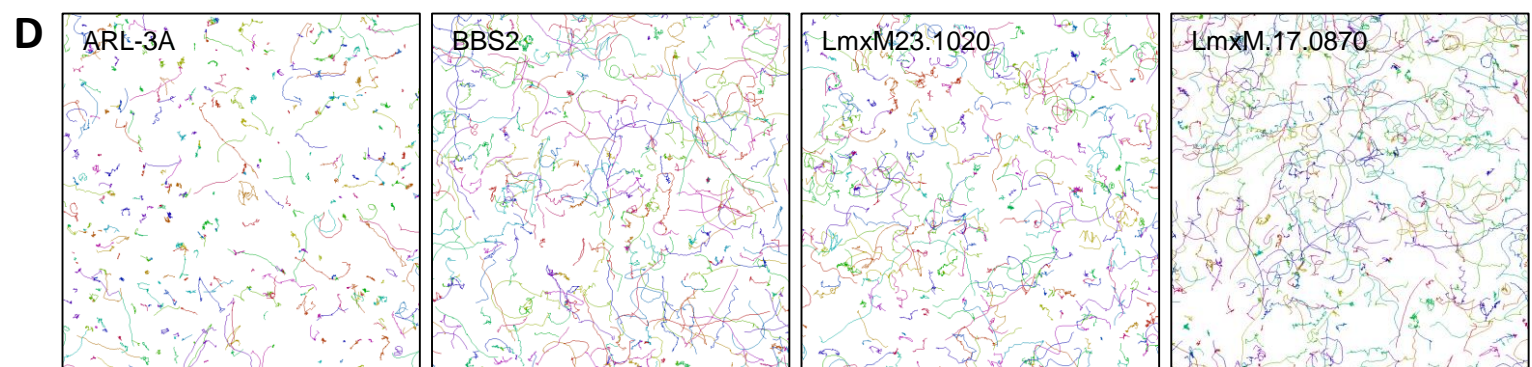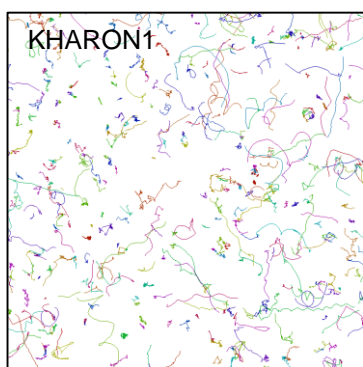

S13 Figure
