# Supplementary material for: Genetic dissection of a Leishmania flagellar proteome demonstrates requirement for directional motility in sand fly infections
Source: PLoS Pathog. 2019 Jun 26;15(6):e1007828. doi: 10.1371/journal.ppat.1007828 (PMC6615630; doi:10.1371/journal.ppat.1007828)
Supplement: S6 Table — (DOCX) [file ppat.1007828.s006.docx]

|  | | |
| --- | --- | --- |
| Action | **Filter type** | **value** |
| Proteo  Wizard | Threshold | Count 200 most-intense |
| Peak picking | True 1- |
| Mascot/X!Tandem kscore/OMSSA | Missed cleavages | 2 |
| Precursor Tolerance | 0.1 Da |
| Charge State(s) | 1+, 2+ and 3+ |
| Fixed Modification | Carbamidomethyl (C) |
| Variable Modifications | Deamidated (N), Deamidated (Q), Oxidation (M) |
| Quantitation | None |
| Quantitation Tolerance | 0.02 |
| CPFP | PSM & Peptide-level FDR | 1.00% |
| PSM & Peptide-level q-value | 0.01 |
| Protein group FDR | 1.00% |
| Protein group q-value | 0.01 |
| SINQ | PROT_MAX_QVAL | 0.01 |
| PSM_MAX_QVAL | 0.01 |
| FRAGMENT_TOL | 0.1 |
| Maximum q-value (local FDR) | 0.01 |
| **Peptides per protein** | **at least 2** |

S6 Table. Mass spectrometry search parameters
